# Supplementary material for: Secretory Aspartyl Proteinases Cause Vaginitis and Can Mediate Vaginitis Caused by Candida albicans in Mice
Source: PubMed Central journal article supplement — mBio. 2015 Jun 2;6(3):e00724-15. doi: 10.1128/mBio.00724-15 (PMC4453014; doi:10.1128/mbio.00724-15), 2015-06-02
Supplement: mbo003152345sf1.pdf [file mbo003152345sf1.pdf]

**A**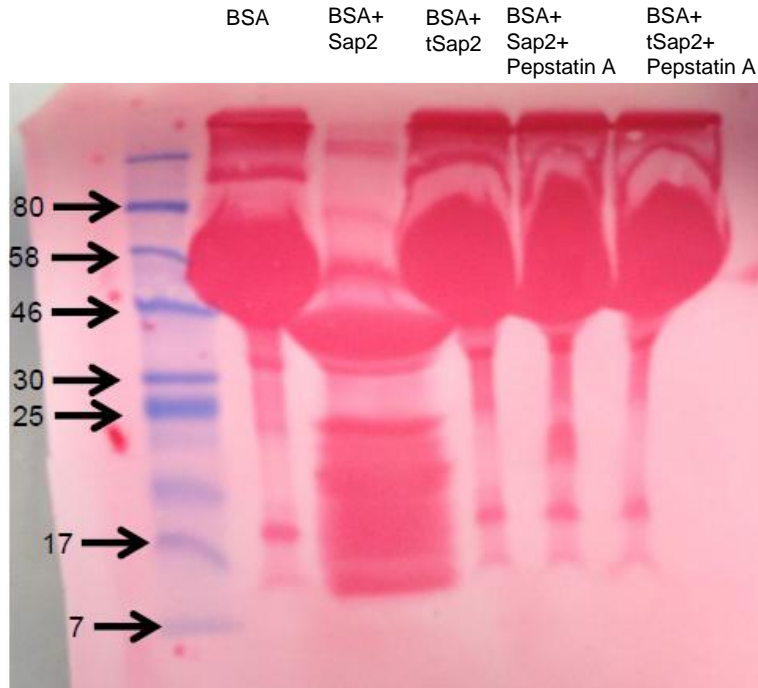**B**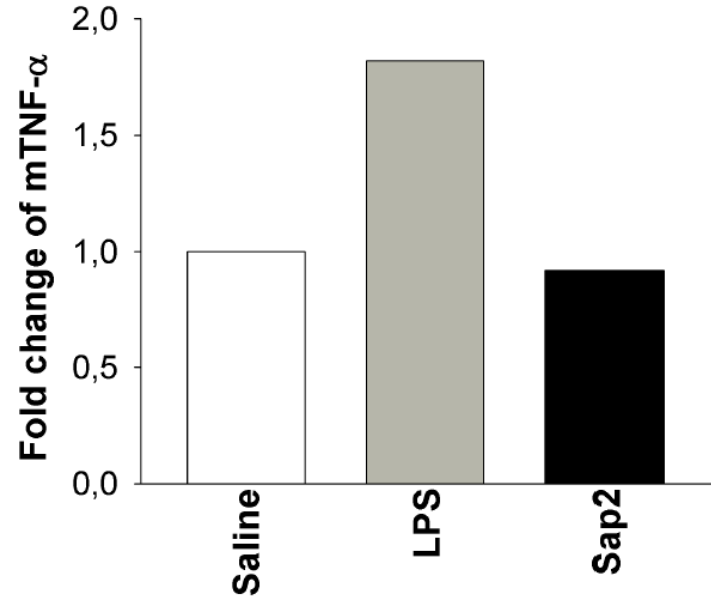

**Supplementary Figure 1. Sap2 activity and effect of Sap2 on the TNF- $\alpha$  production.** Bovine serum albumin (BSA) (1% wt/vol) was incubated in citrate buffer (0.1 M, pH 3.2, at 37°C) for 15 min in the presence or absence of Sap2 or tSap2 (both 100  $\mu$ g/ml) with or without Pepstatin A. After incubation, BSA hydrolysis was performed by SDS-PAGE (**A**). Fold change of TNF- $\alpha$  production from vaginal washes of mice after 24 h of Saline, LPS (50  $\mu$ g/10  $\mu$ l/mouse) or Sap2 (0.5  $\mu$ g/10  $\mu$ l/mouse) treatment are shown. SEM (always below 10%) are not shown in the Figure (**B**).
